# Supplementary material for: A facile novel preparation of three-dimensional Ni@graphene by catalyzed glucose blowing for high-performance supercapacitor electrodes
Source: Royal Society of Chemistry journal article supplement (doi:10.1039/c5ra14141a), 2015-01-01
Supplement: c5ra14141a1.pdf [file c5ra14141a1.pdf]

**Electronic Supplementary Information for**

**A facile novel preparation of three-dimensional Ni@graphene by catalyzed  
glucose blowing for high-performance supercapacitor electrode**

Lizhong Liu, huanli Wang, Zhengwei Zhou, Guangyu He, Xiaoqiang Sun, Qun Chen and Haiqun Chen\*

*Key Laboratory of Advanced Catalytic Materials and Technology, Changzhou University, Jiangsu Province,  
Changzhou 213164, China. Tel: +86 519 86330088; Fax: +86 519 86330086; E-mail: hqchenyf@hotmail.com.*

\*Corresponding author: hqchenyf@hotmail.com (H Chen)

**Experimental details**

**NG Preparation**

The NG was prepared by one-step method. The specific process is as follows: 2.38 g  $\text{NiCl}_2 \cdot 6\text{H}_2\text{O}$ , 2.00 g glucose and 2.00 g  $\text{NH}_4\text{Cl}$  were fully mixed and placed in a tube furnace. The mixture was heated at a rate of 3 °C/min under  $\text{N}_2$  flow to 900 °C and maintained for 3 hours. The MCF was prepared by the above treatment method without adding  $\text{NiCl}_2 \cdot 6\text{H}_2\text{O}$ , while the BRF was prepared by the above treatment method without adding  $\text{NH}_4\text{Cl}$ . Besides, the E-NG and E-BRF were obtained by using 3 M HCl to etch NG and BRF at 80 °C, respectively.

**Characterization**

The structure of the samples was analyzed by powder X-ray diffraction (XRD, Bruker D/max 2500 PC), Raman spectroscopy (Raman, Renishaw RM1000-Invia), field emission scanning electron microscopy (FESEM, SAPHIRE SUPRA55) and transmission electron microscopy (TEM, JEOL JEM-2100). The Brunauer-Emmett-Teller surface area of as-synthesized samples was measured using an ASAP2010C surface aperture adsorption instrument (Micromeritics Instrument Corporation) by  $\text{N}_2$  physisorption at 77 K. The content of Ni in NG was analyzed using inductively coupled plasma atomic emission spectrometry (ICP-AES, Analytik Jena AG, novAA 300) and thermogravimetric analyzer (TG, Rigaku Thermo 209 F3).

## Electrochemical Measurements

Electrochemical measurements were performed in 2 M KOH solution in a three-electrode cell on a CHI 920C electrochemical working station. Platinum foil and a saturated calomel electrode (SCE) were used as the counter and reference electrodes, respectively. The as-prepared powder was mixed with 20 wt% acetylene black, 5 wt% polytetrafluoroethylene and a small amount of deionized water to produce a homogeneous paste, which was pressed onto nickel foam current collectors ( $10 \times 10 \text{ mm}^2$ ) to make working electrode. The mass of active material was in a range of 3.8-8.4 mg.

## DTG of a glucose-NH<sub>4</sub>Cl-NiCl<sub>2</sub>·6H<sub>2</sub>O mixture

Fig. S1 DTG of glucose-NH<sub>4</sub>Cl-NiCl<sub>2</sub>·6H<sub>2</sub>O mixture and glucose-NH<sub>4</sub>Cl mixture.

The first mass loss at 107 °C results from the loss of water in the system. The adjacent strong endothermic peak at 137 °C should be attributed to melting of glucose. The endothermic peak appeared at 168 °C is dominated by Maillard reaction.<sup>1</sup> A strong endothermic peaks appeared at 243 °C, indicating NH<sub>4</sub>Cl gradually decomposed to release HCl and NH<sub>3</sub> gases. In the following process, the NiCl<sub>2</sub> distributed on the surface of the thin wall of the cavities reacted with oxygen atoms on the surface of the glucose-derived polymers to generated NiO around 320 °C.<sup>2</sup> Subsequently, the NiO is converted into metallic Ni at 528 °C.<sup>3,4</sup>

## Effect of different amount of NH<sub>4</sub>Cl on the morphology of the material

Fig. S2 FESEM images of Ni-C materials with 0 g (a), 0.5 g (b), 1.0 g (c) and 1.5 g (d) of NH<sub>4</sub>Cl added; TEM image of etched Ni-C material with 1.5 g of NH<sub>4</sub>Cl added (inset of d).

When no  $\text{NH}_4\text{Cl}$  was added, the distribution of the metal Ni is nonuniform, which easily leads to the agglomeration (Fig. S2a) and low specific surface of metal Ni, restricting the dissolution of C in Ni. When 0.5 g of  $\text{NH}_4\text{Cl}$  was used (Fig. S2b), the agglomeration of metal Ni was declining, but the utilization rate of Ni was still relatively low, which cannot play an effective catalytic graphitization role on carbon source. With the amount of  $\text{NH}_4\text{Cl}$  being increased respectively to 1.0 g and 1.5 g, the shaping performance of  $\text{NH}_4\text{Cl}$  was obvious, and the morphologies of 3D interconnected structures appeared in Ni-C materials (Fig. S2c-d). Nevertheless, the transparent graphene layer was not observed in the TEM image of etched Ni-C materials (with 1.5 g of  $\text{NH}_4\text{Cl}$  added) (the inset of Fig. S2d), suggesting the walls of the cavities was thick and the graphene structure was not formed.

### **XRD patterns of Ni-C composites prepared at different calcination temperature**

Fig. S3 XRD patterns of Ni-C composites prepared at 600, 700, 800, 850, and 900 °C.

### **$\text{N}_2$ adsorption-desorption isotherms characterization of NG**

Fig. S4 Nitrogen adsorption/desorption isotherm of NG.

## TG characterization of NG

Fig. S5 TG curve of the NG composite.

## Refereres

- 1 X. Wang, Y. Zhang, C. Zhi, X. Wang, D. Tang, Y. Xu, Q. Weng, X. Jiang, M. Mitome<sup>1</sup>, D. Golberg and Y. Bando. *Nat. Commun.*, 2013, **4**, 1-8.
- 2 F. Paulik, J. Paulik and M. Arnold. *Thermochim. Acta*, 1987, **121**, 137-149.
- 3 L. M. S. Silva, J. J.M. Órfão and J. L. Figueiredo. *Appl. Cataly. A: Gen.*, 2001, **209**, 145-154.
- 4 I. F. Silva, D. W. McKee and L. S. Lobo. *J. Catal.*, 1997, **170**, 54-61.
